# Supplementary material
Source: bioRxiv or medRxiv preprint supplement (https://medrxiv.org/highwire/filestream/80782/field_highwire_adjunct_files/0/2020.05.07.20093872-1.pdf)
Supplement: Supplementary file [file 2020.05.07.20093872-1.pdf]

| Babylon |                                                       |
|---------|-------------------------------------------------------|
| 1       | call 999 (needs urgent A&E assessment)                |
| 1       | call 999 or Samaritans                                |
| 1       | call ambulance                                        |
| 1       | no data in results section. Call 999.                 |
| 2       | go to (nearest) ED                                    |
|         | might need treatment in hospital - if serious ED      |
| 2       | no data, go to ED                                     |
| 3       | GP next few hours                                     |
| 3       | GP within next 6 hours                                |
| 3       | see doctor urgently                                   |
| 4       | spek to GP today for advice                           |
|         | symptoms complex-talk to medical professional         |
| 4       | pregnancy makes case more complex - speak to a doctor |
| 4       | spek to GP in next few hours                          |
| 5       | see GP within 1 week                                  |
| 5       | see GP                                                |
| 5       | see GP in next couple of days                         |
| 5       | GP for routine appointment                            |
| 5       | no data. routine GP appointment                       |
| 6       | self treatment at home                                |
| 6       | can be managed at home                                |

| tested-GPs |                        |
|------------|------------------------|
| 1          | call ambulance         |
| 2          | ED                     |
| 3          | primary care 4hrs      |
| 4          | primary care same day  |
| 5          | primary care 2-3 days  |
| 6          | primary care 2-3 weeks |
| 7          | self-care              |
| 8          | self-care pharmacy     |

| Symptomate |                                         |
|------------|-----------------------------------------|
| 2          | immediate medical attention recommended |
| 3          | prompt medical attention recommended    |
| 3          | prompt medical advice recommended       |
| 3          | prompt medical attention required       |
| 5          | may require medical attention           |

| Ada |                                                                          |
|-----|--------------------------------------------------------------------------|
| 1   | call ambulance                                                           |
| 2   | go to ED                                                                 |
| 2   | seek emergency care                                                      |
| 2   | urgent medical care                                                      |
| 3   | see GP within next 4 hours                                               |
| 3   | prompt medical care                                                      |
| 3   | seek medical advice within the next few hours                            |
| 4   | seek medical advice                                                      |
| 5   | doctor routine appointment                                               |
| 5   | seek medical advice (2-3 days)                                           |
| 6   | can usually be managed at home; manage at home; can seek advice pharmacy |

| Gold Standard Triage |                                      |
|----------------------|--------------------------------------|
| 1                    | call ambulance                       |
| 2                    | go to ED                             |
|                      | see primary care within next 4 hours |
| 3                    | hours                                |
| 4                    | see primary care same day            |
| 5                    | see primary care non-urgent          |
| 6                    | home care                            |

| Buoy |                                                         |
|------|---------------------------------------------------------|
| 1    | emergency medical advice; Call 911.                     |
| 2    | ER; Requires immediate medical care                     |
| 2    | emergency medical services                              |
| 3    | in-person visit today (as soon as possible)             |
| 4    | primary care doctor within 1-2 days                     |
| 5    | primary care doctor within 2 weeks                      |
| 5    | phone call or in person visit (sometime in next 3 days) |
| 5    | primary care doctor                                     |
| 6    | self-treatment                                          |
| 6    | wait and watch                                          |

| K Health |                                                                                       |
|----------|---------------------------------------------------------------------------------------|
| 1        | urgent ambulance and emergency serious health condition/ emergency medicine physician |
| 2        | emergency medicine physician                                                          |
| 2        | immediate medical care                                                                |
| 3        | primary care physician - immediate                                                    |
| 3        | serious health condition                                                              |
| 3        | seek medical advice within the next view hours                                        |
| 5        | primary care physician                                                                |
| 5        | primary care physician or physical therapist                                          |
| 5        | primary care physician or psychiatrist                                                |
| 5        | gynaecologist                                                                         |
| 5        | primary care                                                                          |
| 5        | pharmacist or primary care physician                                                  |
| 6        | pharmacist                                                                            |

| Your.MD |                                                                  |
|---------|------------------------------------------------------------------|
| 1       | emergency - call an ambulance or go to the hospital immediately. |
| 2       | emergency                                                        |
| 2       | urgent                                                           |
| 4       | urgent - you should see a doctor within 48 hours.                |
| 5       | see doctor within 2 weeks                                        |
| 5       | please see a doctor                                              |
| 5       | see doctor if symptoms persist                                   |
| 5       | no cause found. Advised to see a doctor                          |
| 6       | symptoms should get better                                       |
| 6       | should be better without treatment.                              |
| 6       | should get better without treatment.                             |
| 6       | see a doctor if symptoms continue                                |
| 6       | no treatment needed                                              |
| 6       | wait and watch                                                   |

| Mediktor |                                                                                                                                   |
|----------|-----------------------------------------------------------------------------------------------------------------------------------|
| 1        | if medical emergency, dial 911                                                                                                    |
| 2        | high urgency                                                                                                                      |
| 2        | medical emergency                                                                                                                 |
|          | medium urgency - go to hospital as soon as possible, it is very likely you need medical care.                                     |
| 3        | medium, consider going to hospital                                                                                                |
|          | medium urgency - check the description of the relevant diseases and, if you have any questions, check with a health professional. |
| 4        | medium                                                                                                                            |
| 5        | medium                                                                                                                            |
| 6        | low                                                                                                                               |

| WebMD |                                                                       |
|-------|-----------------------------------------------------------------------|
| 1     | urgent flag - call 911                                                |
| 2     | urgent flag - see doctor immediately or go to hospital emergency room |
| 5     | moderate                                                              |
| 6     | low                                                                   |
